# Supplementary figures and images for: Adapting non-invasive human recordings along multiple task-axes shows unfolding of spontaneous and over-trained choice
Source: eLife journal article supplement (doi:10.7554/elife.60988), 2021-05-11

**A**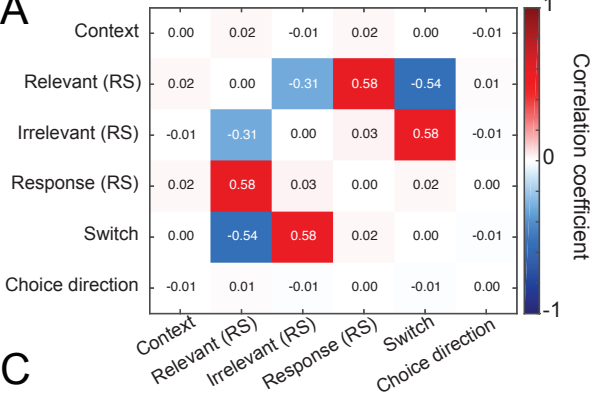**B**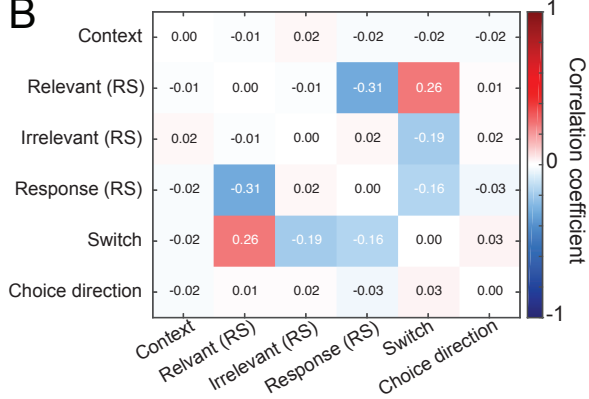**C**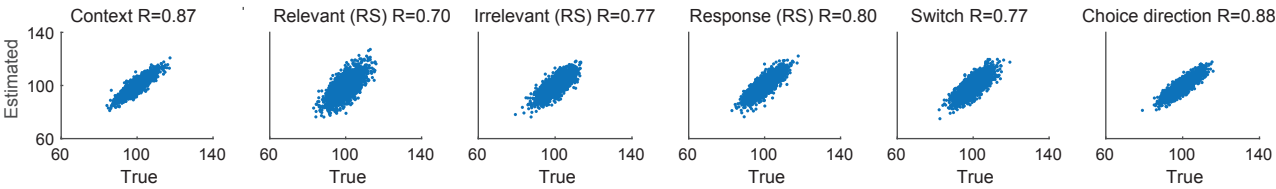

Supplement: supp [file elife-60988-supp-v1.zip]

A

## Timeline of experiment

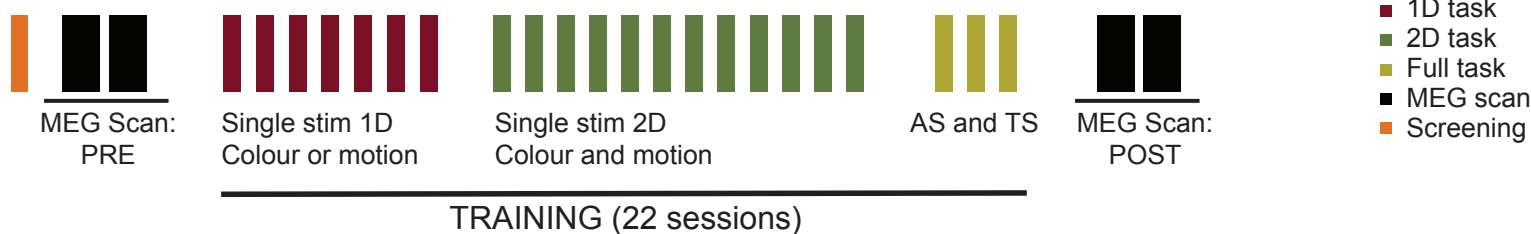

B

## Percentage correct

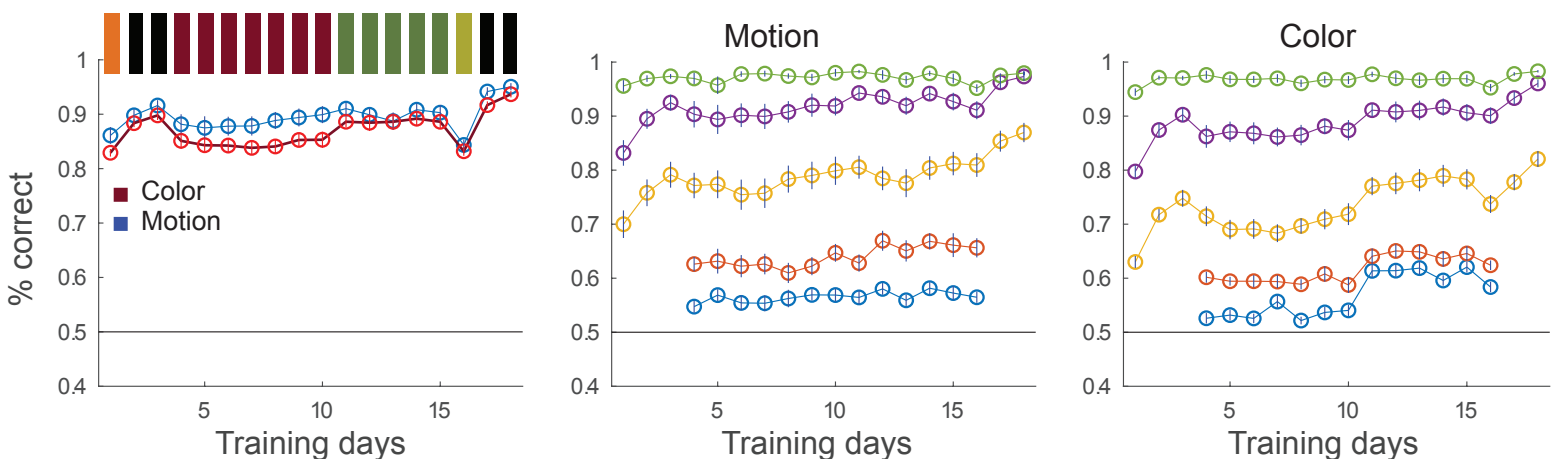

C

## Reaction time

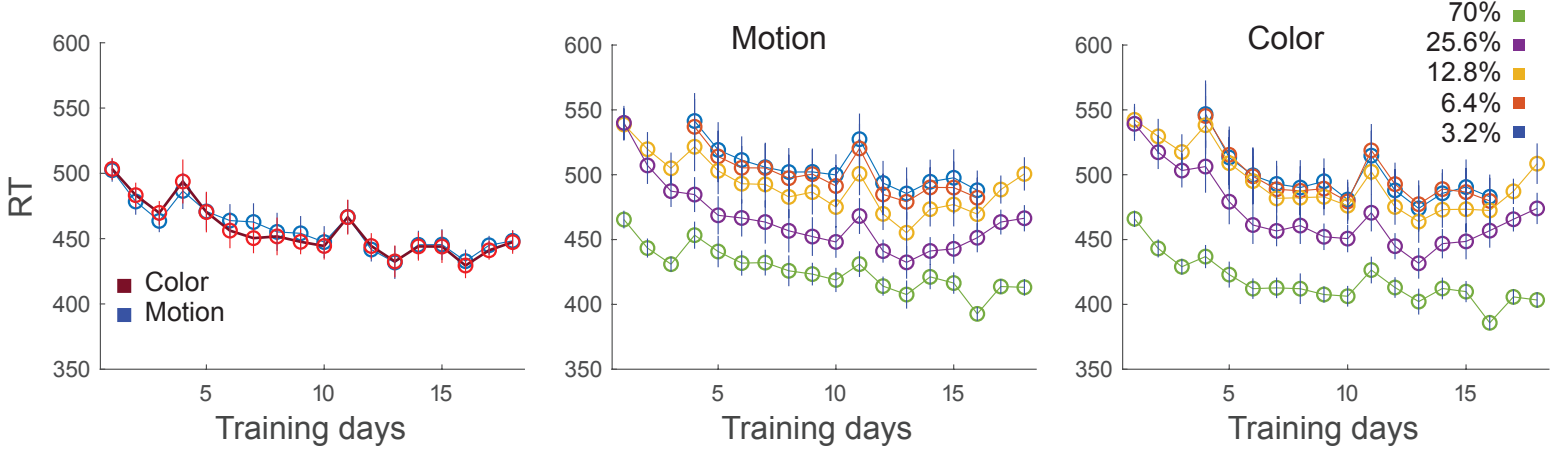

Supplement: supp [file elife-60988-supp-v1.zip]

**A**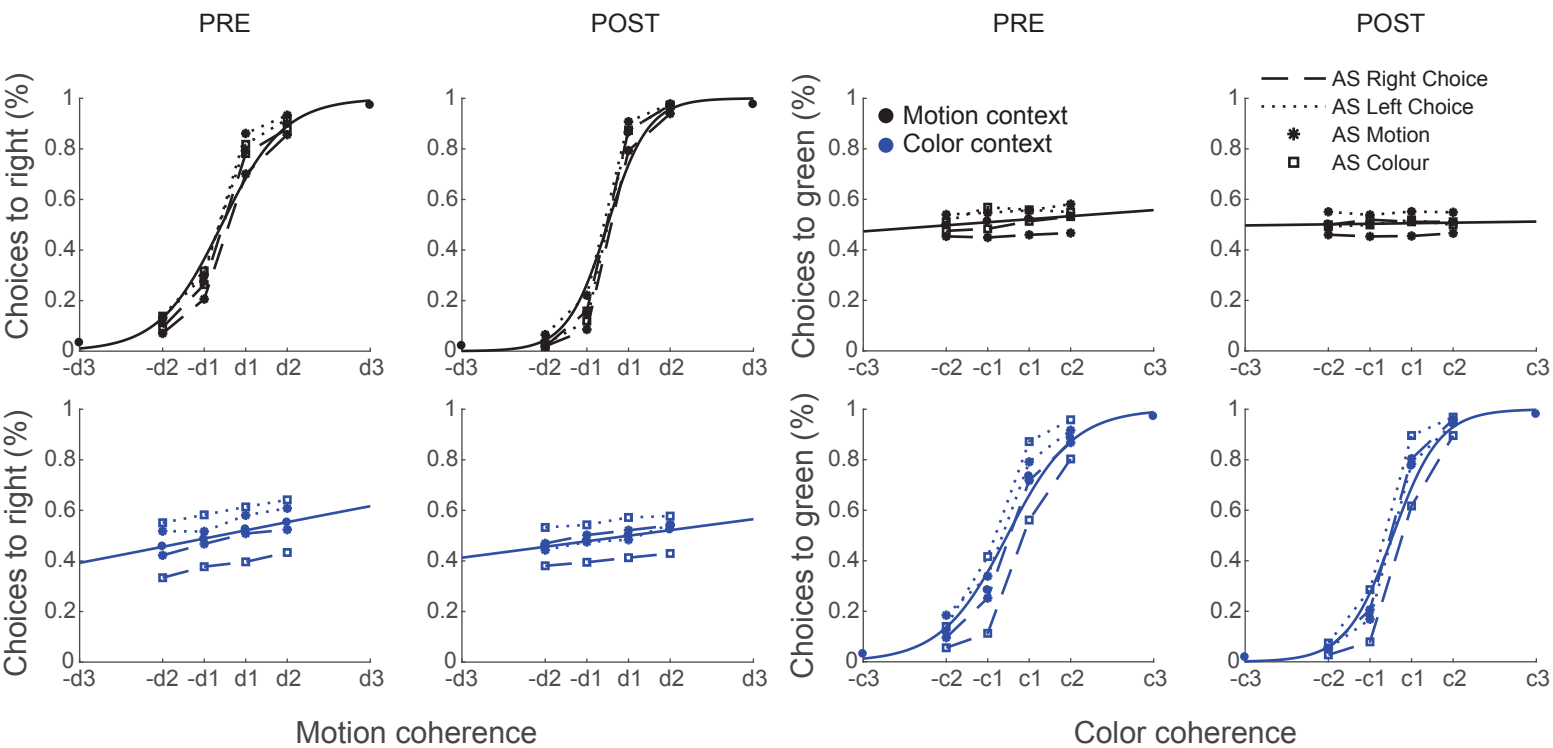**B**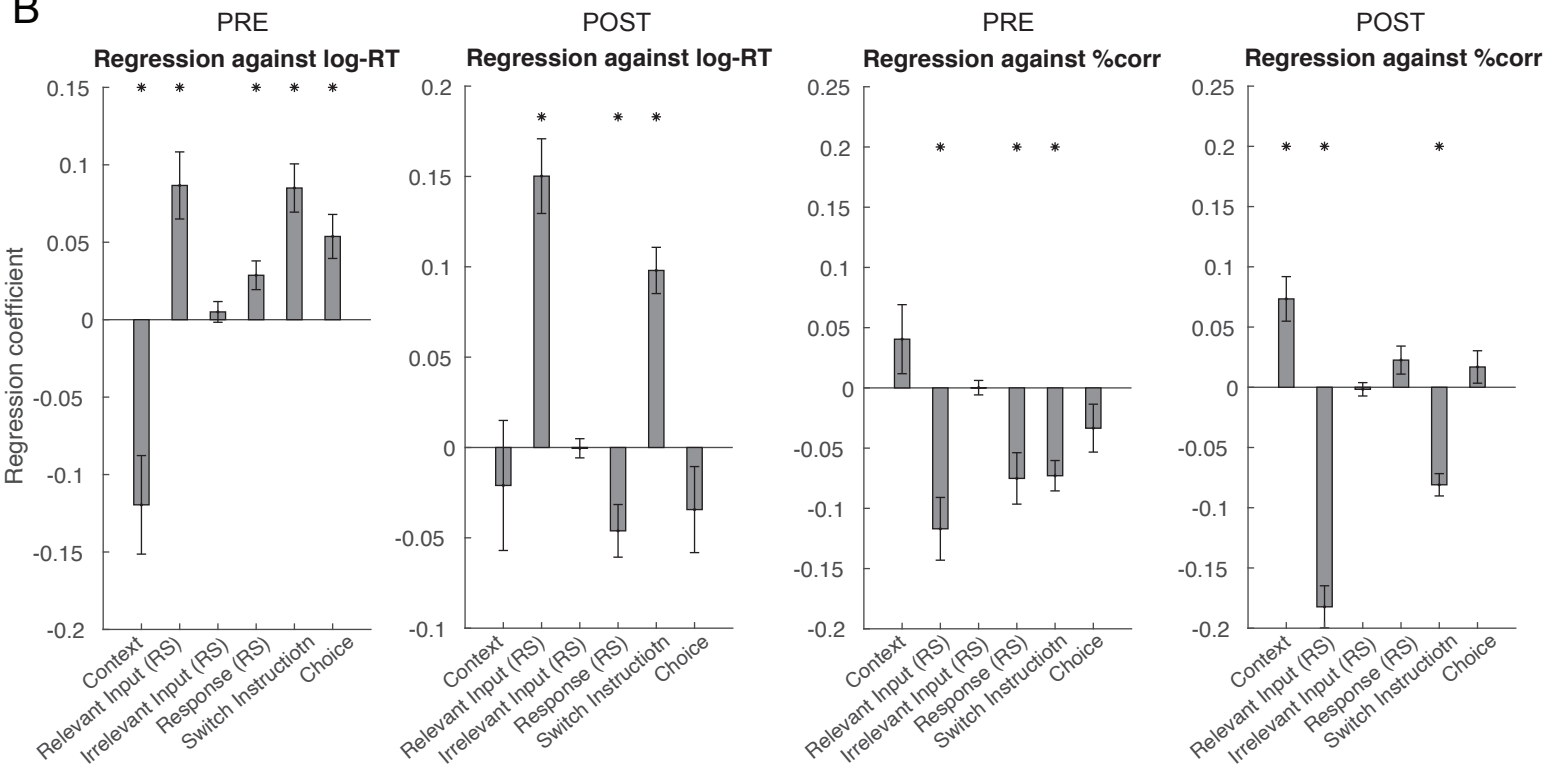

Supplement: supp [file elife-60988-supp-v1.zip]

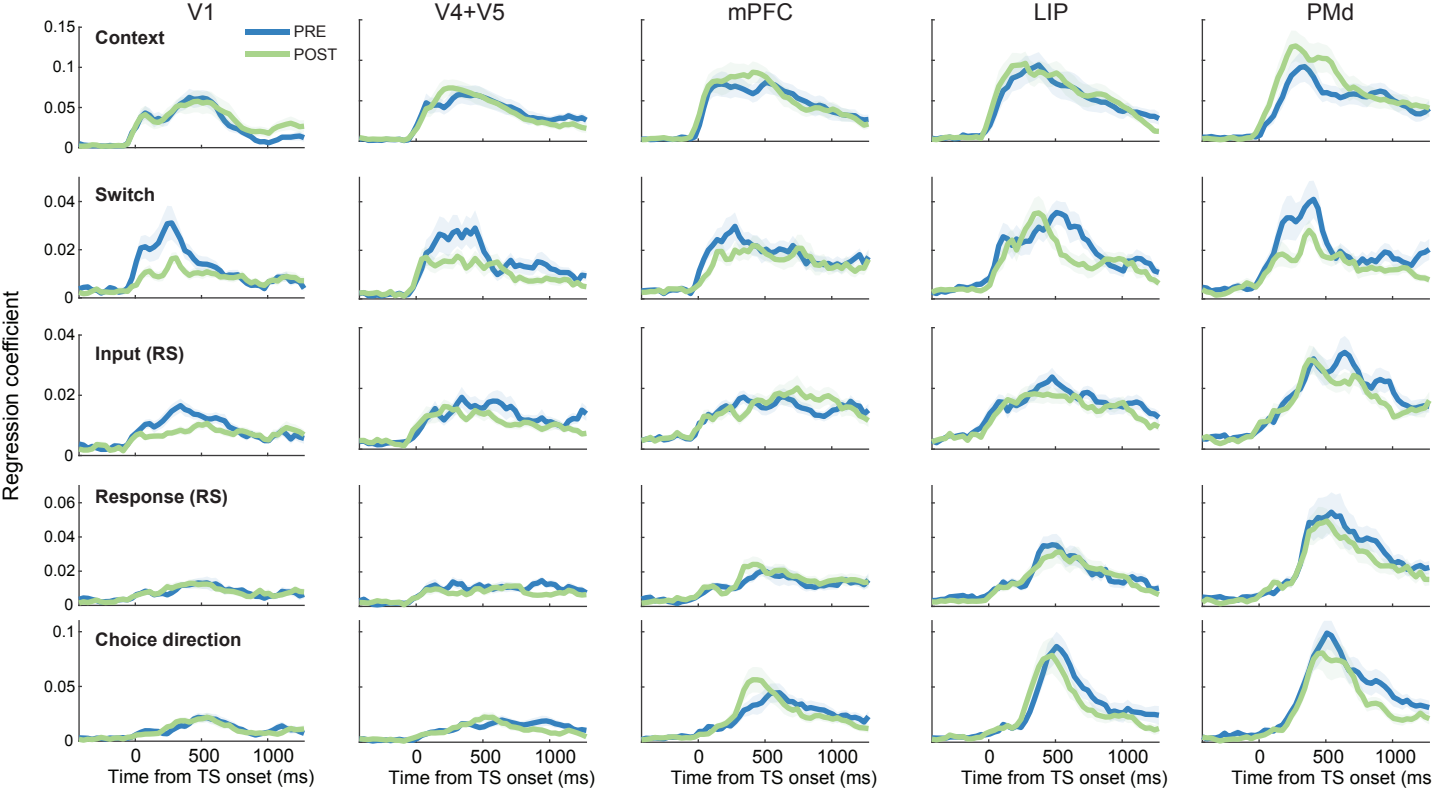

Supplement: supp [file elife-60988-supp-v1.zip]

A

 $p = 1$ 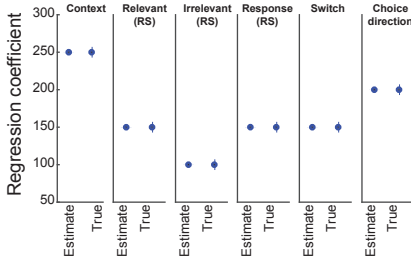

B

 $p = 10$ 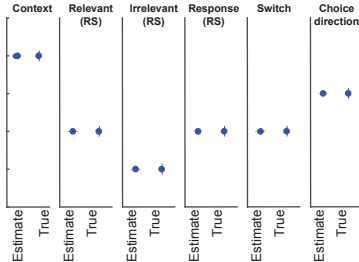

C

 $p = 50$ 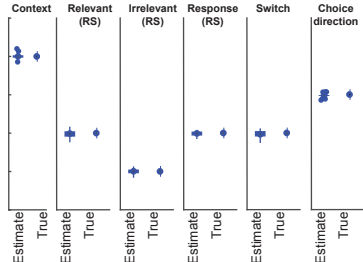

Supplement: supp [file elife-60988-supp-v1.zip]

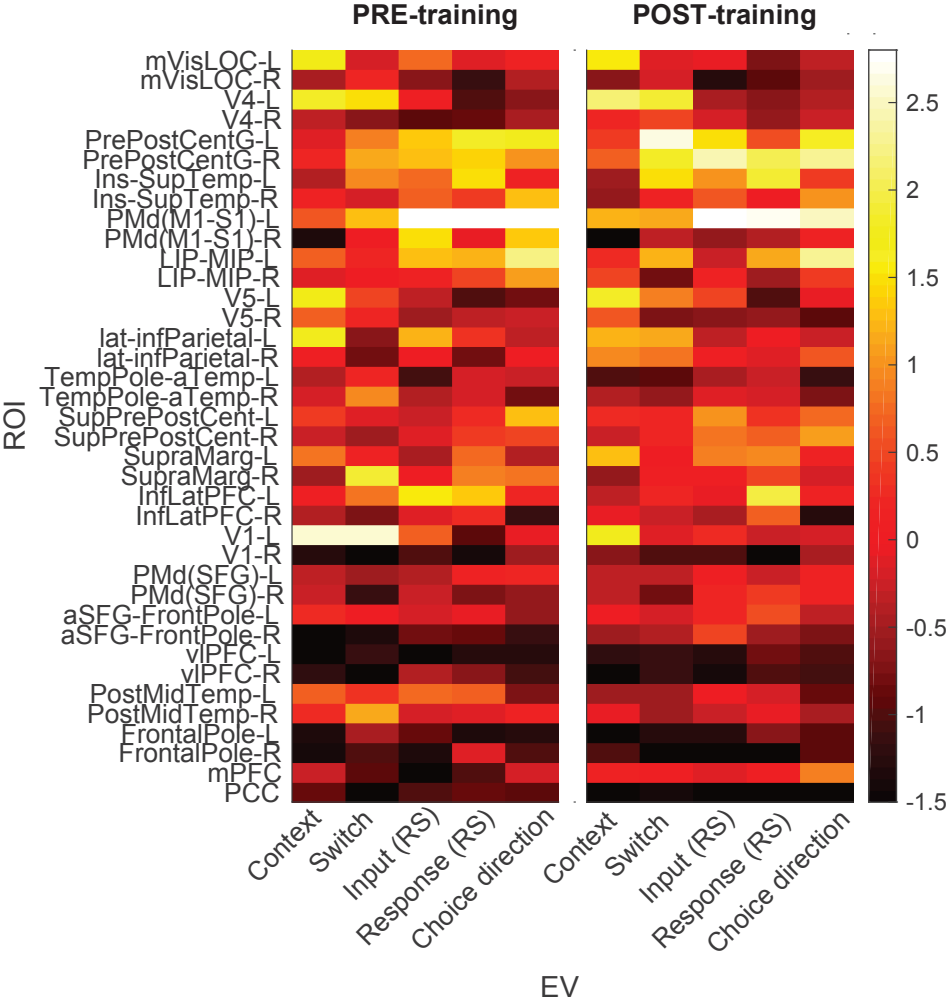

Supplement: supp [file elife-60988-supp-v1.zip]

# A Evolution of choice

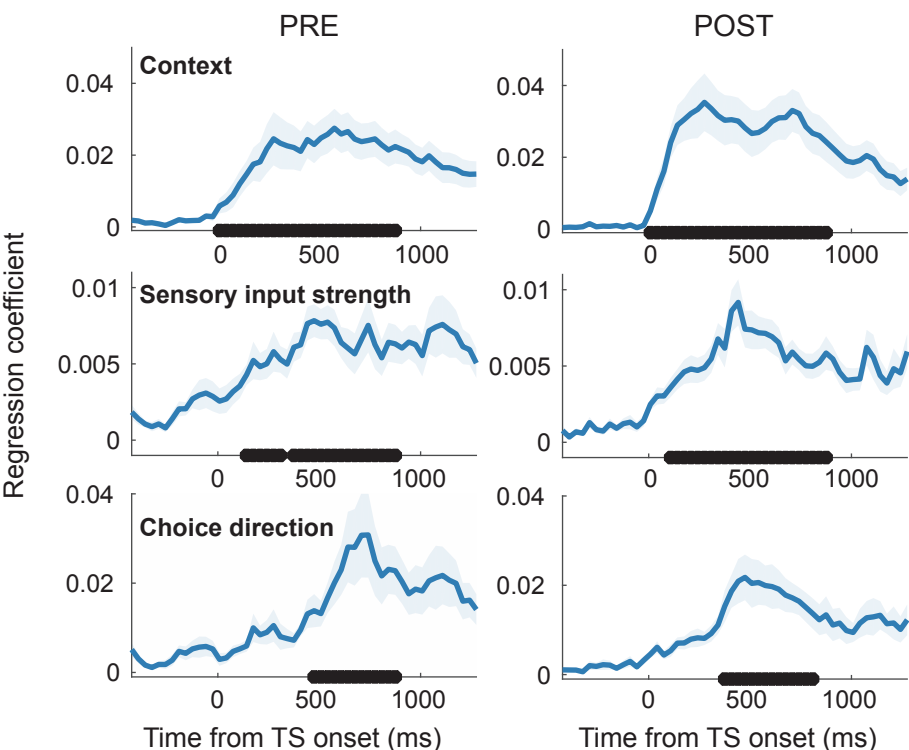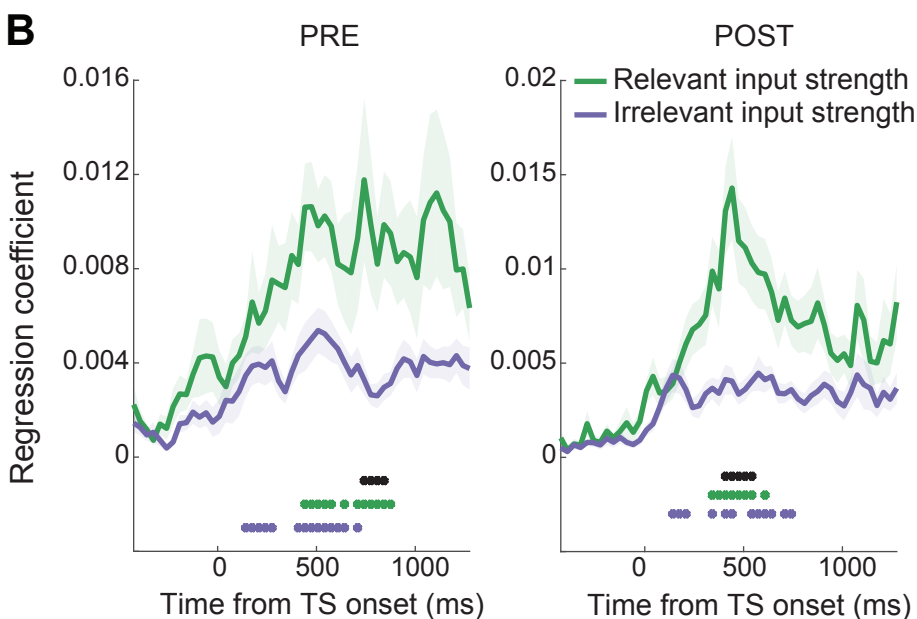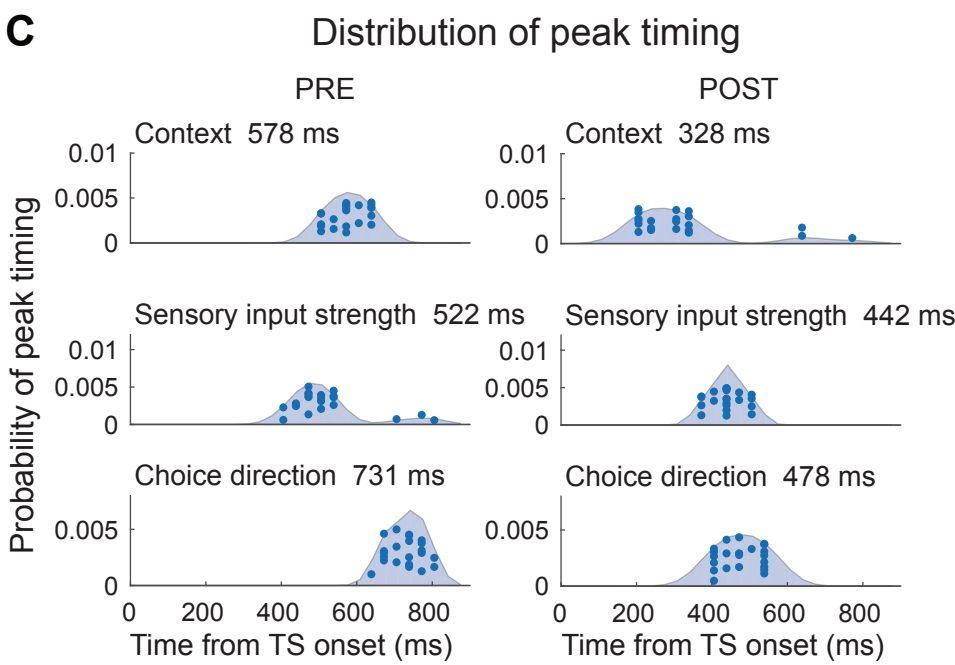

Supplement: supp [file elife-60988-supp-v1.zip]
